# Supplementary material for: Secondary Metabolites Coordinately Protect Grapes from Excessive Light and Sunburn Damage during Development
Source: MDPI journal article supplement (doi:10.3390/biom12010042), 2021-12-28
Supplement: s1 [file s1]

**SUPPLEMENTARY INFORMATION FOR**

**Secondary metabolites coordinately protect grapes from excessive  
light and sunburn damage during development**

**Joanna M. Gambetta<sup>a,b,1\*</sup>, Valentina Romat<sup>a</sup>, Leigh M. Schmidtke<sup>a</sup>, Bruno Holzapfel<sup>a,c</sup>**

<sup>a</sup>School of Agricultural, Environmental and Veterinary Sciences, National Wine and Grape Industry Centre, Charles Sturt University, Locked Bag 588, Wagga Wagga, NSW 2678, Australia

<sup>b</sup>Waite Research Institute, School of Agriculture, Food and Wine, University of Adelaide, PMB1, Glen Osmond, South Australia 5064, Australia

<sup>c</sup>Wagga Wagga Agriculture Institute, New South Wales Department of Primary Industries, Wagga Wagga, NSW 2650, Australia

\*Correspondence: [joanna.gambetta@adelaide.edu.au](mailto:joanna.gambetta@adelaide.edu.au)

<sup>1</sup>Present Address: CSIRO Agriculture and Food, 671 Sneydes Road, Werribee, VIC 3030, Australia

## 5. Experimental

### 5.1 Climatic monitoring and vineyard measurements

Growing degree day (DD) for each site were calculated between the October 1st and April 30th using 10 °C as base temperature. Leaf area (m<sup>2</sup>, LA) for every treatment was calculated shortly after each defoliation treatment was implemented. Ten representative shoots were collected from every row and transported to the lab where the number of leaves per shoot was counted and their area measured using a LLI-3100C leaf area meter (LI-COR, Lincoln, Nebraska, USA). LA per plant was estimated by multiplying unit leaf area, average number of leaves per shoot and number of shoots per plant.

Midday stem water potential (SWP) determinations were carried out every two weeks between 12h00 and 14h00 with a single leaf removed per vine per measurement as described by Choné et al. (2001) and Rossouw et al. (2017) (Choné et al., 2001; Rossouw et al., 2017). Measurements were performed using a pressure chamber (Model 1000, PMS instruments, Albany, Oregon, USA).

Yield per plant at harvest was estimated by counting and weighing all bunches in each plant.

### 5.5 Chemical analyses

#### 5.5.1 Reagents

Deuterated internal standards d3-linalool, d13-1-hexanol, d12-hexanal were supplied by CDN Isotopes (Point-139 Claire, Quebec, CN). Lutein (94%), zeaxanthin (97%), violaxanthin (95%) and neoxanthin (97%) were obtained from CaroteNature GmbH (Lupsingen, Switzerland). Sodium chloride (analytical grade) was provided by JT Baker (Phillipsburg, New Jersey, USA) and water was obtained from a Milli-Q purification system (Millipore, North Ryde, NSW, Australia).

#### 5.5.2 Basic grape chemistry

Total soluble solids (TSS) were measured using a digital portable refractometer (PR-101, Atago, Tokyo, Japan) and titratable acidity (TA) and pH were measured using an automatic titrator (Metrohm Fully Automated 59 Place Titrand System, Metrohm AG, Herisau, Switzerland) to an end point of pH 8.2.

#### 5.5.5 Carotenoid and chlorophyll extraction and UPLC-DAD analysis

Samples for carotenoid and chlorophyll analysis were first deseeded and ground under liquid nitrogen using an A11 basic analytical mill (IKA, Selangor, Malaysia). Two mL of a mix of methanol, chloroform and water (2:2:1) were added to 1 g of frozen grape berry powder, and 20 µL trans-β-Apo-8'-carotenal (25 µg/L in ethyl acetate) was used as internal standard. Samples were then briefly vortexed, extracted for 15 min with a Ratek rotary mixer (RSM7DC, Ratek Instruments Pty Ltd, Boronia, Victoria, Australia) and centrifuged. The chloroform layer was then collected and evaporated to dryness under a stream of nitrogen after addition of 20 µL of a solution of TEA (0.1% V/V in chloroform). Samples were resuspended with 100 µL ethyl acetate and 400 µL methanol immediately before injection. Standard stock solutions were prepared in ethyl acetate (carotenoids) or acetone (Chlorophyll a) and dilutions were made using ethyl acetate.

### 5.6 Statistical analyses

All blocks were pre-treated prior to ASCA as follows: CAR data was normalized using unit-variance scaling and PP and FV were mean-centered and Pareto-scaled. All blocks were then scaled by dividing

each matrix by its Frobenius' norm, and concatenated into a single megablock with 80 variables (Biancolillo et al., 2015). One thousand permutation rounds were performed to assess the statistical significance of each factor and their interaction.

Prior to MB-SO-PLS-LDA, variables that were not significantly different (according to 1-way ANOVA) between SB damage levels were removed from each block. All blocks (CAR, PP and FV) were then pre-treated as for ASCA, but they were not scaled. Block order and inclusion were determined by the combination yielding the best classification results after testing all possible combinations. The order determined was PP-FV. Optimal number of latent variables (LVs) was determined using a Mage Plot as the combination that yielded both the least RMSECV and lowest % classification error (Biancolillo et al., 2015).

## References

- Biancolillo, A., Måge, I., & Næs, T. (2015). Combining SO-PLS and linear discriminant analysis for multi-block classification. *Chemometrics and Intelligent Laboratory Systems*, 141, 58–67. <https://doi.org/10.1016/j.chemolab.2014.12.001>
- Choné, X., Van Leeuwen, C., Dubourdieu, D., & Gaudillère, J. P. (2001). Stem water potential is a sensitive indicator of grapevine water status. *Annals of Botany*, 87(4), 477–483. <https://doi.org/10.1006/anbo.2000.1361>
- Rossouw, G. C., Smith, J. P., Barril, C., Deloire, A., & Holzapfel, B. P. (2017). Carbohydrate distribution during berry ripening of potted grapevines: Impact of water availability and leaf-to-fruit ratio. *Scientia Horticulturae*, 216, 215–225. <https://doi.org/10.1016/j.scienta.2017.01.008>

**Table S1.** Vineyard characteristics and key trial dates

|                       |                 | <b>Vineyard</b>                  |                                  |
|-----------------------|-----------------|----------------------------------|----------------------------------|
|                       |                 | <b>BAL</b>                       | <b>CUM</b>                       |
| Location              |                 | 33°16'03.9" S,<br>148°59'59.0" E | 32°58'47.4" S,<br>148°57'42.8" E |
| Altitude              |                 | 884 m.a.s.l.                     | 612 m.a.s.l.                     |
| Date of plantation    |                 | 1995 (grafted onto Shiraz)       | 2000 (own roots)                 |
| Defoliation<br>Timing | ND <sup>1</sup> | Not performed                    | Not performed                    |
|                       | ED              | 6/12/2018 (9 DAF <sup>2</sup> )  | 6/12/2018 (17 DAF)               |
|                       | LD              | 23/1/2019 (56 DAF)               | 8/1/2019 (50 DAF)                |
| Harvest               |                 | 1/3/2019                         | 4/2/2019                         |

<sup>1</sup>Designates treatments: no defoliation, ND; early defoliation, ED; late defoliation, LD. <sup>2</sup> Days after flowering, DAF

**Table S2.** Mean and standard deviation values of bunch number, bunch weight, yield and leaf area (LA) per plant and LA per kg of fruit for both sites (BAL and CUM) at harvest.

| Vineyard |                                  | ND <sup>1</sup>         | ED          | LD          |
|----------|----------------------------------|-------------------------|-------------|-------------|
| BAL      | No. of bunches/vine              | 36 ± 3                  | 40 ± 2      | 42 ± 2      |
|          | Bunch weight (g)                 | 125 ± 16                | 122 ± 16    | 125 ± 33    |
|          | Yield/plant (kg)                 | 4.49 ± 0.78             | 4.84 ± 0.89 | 5.25 ± 1.31 |
|          | LA (m <sup>2</sup> )             | 11.1 ± 3.3              | 9.1 ± 2.7   | 7.9 ± 2.1   |
|          | LA/kg fruit (m <sup>2</sup> /kg) | 2.4 ± 0.4a <sup>2</sup> | 1.8 ± 0.4a  | 1.4 ± 0.2b  |
| CUM      | No. of bunches/vine              | 50 ± 12                 | 42 ± 6      | 51 ± 6      |
|          | Bunch weight (g)                 | 93 ± 24                 | 89 ± 25     | 87 ± 23     |
|          | Yield/plant (kg)                 | 4.55 ± 1.15             | 3.85 ± 1.61 | 4.45 ± 1.16 |
|          | LA (m <sup>2</sup> )             | 8.0 ± 0.6               | 6.0 ± 1.5   | 6.3 ± 2.0   |
|          | LA/kg fruit (m <sup>2</sup> /kg) | 1.8 ± 0.3               | 1.7 ± 1.1   | 1.4 ± 0.7   |

<sup>1</sup>Designates treatments: no defoliation, ND; early defoliation, ED; late defoliation, LD. <sup>2</sup>Different letters across a row designate significant differences between different treatments within a vineyard, according to Tukey's HSD.

**Table S3.** Monthly total radiation, average daily maximum solar radiation, average temperature and rainfall from December 2018 until January 2019

| Vineyard | Month          | Total Radiation<br>(mol/m <sup>2</sup> ) | Average daily max. solar<br>radiation (W/m <sup>2</sup> ) | Avg. temp<br>(°C) | Rainfall<br>(mm) |
|----------|----------------|------------------------------------------|-----------------------------------------------------------|-------------------|------------------|
| BAL      | Dec            | 1241                                     | 667                                                       | 21.9              | 91               |
|          | Jan            | 1590                                     | 663                                                       | 26.0              | 68               |
|          | Feb            | 1378                                     | 635                                                       | 20.9              | 48               |
|          | Growing Season | 1403                                     | 655                                                       | 22.9              | 69               |
| CUM      | Dec            | 1296                                     | 665                                                       | 24.1              | 61               |
|          | Jan            | 1369                                     | 615                                                       | 28.2              | 69               |
|          | Growing Season | 1333                                     | 640                                                       | 26.2              | 65               |

**Table S4.** Chemical composition of berries with varying levels of sunburn browning damage (SB0-SB3)

|     |                                       | <i>SB0</i>                | <i>SB1</i>   | <i>SB2</i>    | <i>SB3</i>   |
|-----|---------------------------------------|---------------------------|--------------|---------------|--------------|
| CAR | Carotenoids                           |                           |              |               |              |
|     | Neoxanthin                            | 0.49 ± 0.04b <sup>1</sup> | 0.39 ± 0.03a | 0.43 ± 0.01ab | 0.45 ± 0.03b |
|     | Violaxanthin                          | 0.73 ± 0.03a              | 0.88 ± 0.03b | 1.1 ± 0.03c   | 1.2 ± 0.08c  |
|     | Zeaxanthin                            | 0.29 ± 0.01a              | 1.5 ± 0.2b   | 2.6 ± 0.05c   | 2.8 ± 0.05c  |
|     | Lutein                                | 7.6 ± 0.1b                | 6.4 ± 0.2a   | 6.9 ± 0.03ab  | 7.3 ± 0.5b   |
|     | β-Carotene                            | 3.9 ± 0.2b                | 3.2 ± 0.2a   | 4.1 ± 0.2bc   | 4.6 ± 0.3c   |
|     | Chlorophylls                          |                           |              |               |              |
|     | Chlorophyll a                         | 10 ± 1c                   | 6.0 ± 0.7b   | 4.2 ± 0.8a    | 4.9 ± 0.3ab  |
|     | Chlorophyll b                         | 5.4 ± 0.6b                | 3.7 ± 0.05a  | 3.1 ± 0.1a    | 3.4 ± 0.4a   |
|     | <i>Chlorophyll a/b</i>                | 2.0 ± 0.2                 | 1.6 ± 0.2    | 1.4 ± 0.3     | 1.5 ± 0.1    |
|     | β-Carotene/Chlorophyll                | 0.73 ± 0.06               | 0.86 ± 0.04  | 1.3 ± 0.0     | 1.4 ± 0.1    |
| PP  | Flavonoids                            |                           |              |               |              |
|     | Quercetin 3-O-glc (μg/g) <sup>2</sup> | 20 ± 1a                   | 89 ± 9b      | 108 ± 5c      | 111 ± 4c     |
|     | Quercetin 3-O-gal (μg/g)              | 3.3 ± 0.3a                | 15 ± 1b      | 19 ± 1c       | 20 ± 2c      |
|     | Quercetin 3-O-gln (μg/g)              | 2.7 ± 0.2a                | 12 ± 2c      | 9 ± 1b        | 9 ± 1b       |
|     | Laricitrin 3-O-glc                    | 2.4 ± 0.2a                | 4.5 ± 0.3b   | 2.2 ± 0.1a    | 2.2 ± 0.0a   |
|     | Myricetin 3-O-glc                     | 12 ± 0.5a                 | 34 ± 7b      | 33 ± 0.4b     | 42 ± 6b      |
|     | Myricetin 3-O-gal                     | 3.0 ± 0.8a                | 7.2 ± 0.4b   | 4.2 ± 0.4a    | 6.2 ± 0.5b   |
|     | Myricetin 3-O-gln                     | 20 ± 5a                   | 22 ± 2a      | 26 ± 6a       | 33 ± 2b      |
|     | Isorhamnetin 3-O-glc                  | 22 ± 0.2a                 | 122 ± 5b     | 97 ± 21b      | 95 ± 20b     |
|     | Isorhamnetin 3-O-gln                  | 3.3 ± 0.5a                | 9.7 ± 2.2b   | 22 ± 5c       | 26 ± 2c      |
|     | Kaempferol 3-O-glc (μg/g)             | 2.1 ± 0.2a                | 15 ± 3b      | 20 ± 0.9b     | 20 ± 1b      |
|     | Kaempferol 3-O-gal (μg/g)             | 0.08 ± 0.0a               | 4.3 ± 0.3b   | 5.3 ± 0.4c    | 5.3 ± 0.4c   |
|     | Kaempferol 3-O-gln (μg/g)             | 0.09 ± 0.01a              | 0.26 ± 0.02b | 0.41 ± 0.05c  | 0.25 ± 0.01b |
|     | Astilbin (μg/g)                       | 0.94 ± 0.07a              | 1.6 ± 0.1b   | 1.8 ± 0.1b    | 1.7 ± 0.3b   |
|     | Dihydroquercetin                      | 28 ± 0.4a                 | 53 ± 12b     | 33 ± 2a       | 25 ± 5a      |
|     | Rutin (μg/g)                          | 0.16 ± 0.01a              | 0.26 ± 0.02b | 0.27 ± 0.01b  | 26 ± 0.03b   |
|     | Procyanidin Dimer B1 (μg/g)           | 0.82 ± 0.05a              | 1.32 ± 0.10b | 0.96 ± 0.11a  | 0.86 ± 0.13a |
|     | Flavan-3-ols                          |                           |              |               |              |
|     | (+)-Gallocatechin (μg/g)              | 3.7 ± 0.1ab               | 4.6 ± 0.8b   | 2.5 ± 0.4a    | 2.8 ± 0.3a   |
|     | (-)-Epigallocatechin (μg/g)           | 0.47 ± 0.02b              | 0.78 ± 0.2c  | 0.27 ± 0.01a  | 0.31 ± 0.05a |
|     | (+)-Catechin (μg/g)                   | 7.5 ± 0.2ab               | 8.2 ± 0.7b   | 6.0 ± 0.7a    | 6.4 ± 0.9ab  |
|     | (-)-Epicatechin (μg/g)                | 6.1 ± 0.1ab               | 6.5 ± 0.5b   | 4.8 ± 0.6a    | 5.2 ± 0.7a   |
|     | (-)-Epicatechin gallate               | 7.6 ± 0.4a                | 17 ± 3c      | 12 ± 1b       | 18 ± 0.7c    |
|     | Stilbenoids and chalcones             |                           |              |               |              |
|     | Z-Resveratrol (μg/g)                  | 0.15 ± 0.02a              | 0.18 ± 0.04a | 0.49 ± 0.19b  | 0.78 ± 0.08c |
|     | E-Resveratrol (μg/g)                  | 2.0 ± 0.3a                | 3.1 ± 0.2b   | 2.3 ± 0.3a    | 2.1 ± 0.3a   |
|     | Trimer                                | 48 ± 0.5a                 | 75 ± 10b     | 56 ± 2a       | 52 ± 8a      |
|     | Z-Piceid                              | 4.7 ± 0.2a                | 6.2 ± 0.3b   | 6.6 ± 0.1b    | 7.2 ± 0.8b   |
|     | Naringenin chalcone                   | 2.1 ± 0.1a                | 2.8 ± 0.1b   | 3.0 ± 0.1b    | 3.3 ± 0.5b   |
|     | Amino Acids                           |                           |              |               |              |

|  |                                               |                 |                 |                |                 |
|--|-----------------------------------------------|-----------------|-----------------|----------------|-----------------|
|  | Tyrosine (µg/g)                               | 0.30 ± 0.03     | 0.31 ± 0.07     | 0.30 ± 0.01    | 0.26 ± 0.03     |
|  | Tryptophan                                    | 0.62 ± 0.05     | 0.62 ± 0.01     | 0.59 ± 0.08    | 0.57 ± 0.12     |
|  | Phenylalanine (µg/g)                          | 4.1 ± 0.4b      | 3.5 ± 0.6ab     | 3.1 ± 0.1ab    | 2.6 ± 0.3a      |
|  | Glutathione reduced (µg/g)                    | 0.35 ± 0.02ab   | 3.0 ± 0.08c     | 0.29 ± 0.11a   | 0.70 ± 0.18b    |
|  | Glutathione oxidised (ng/g)                   | 2.6 ± 0.2a      | 7.3 ± 1.5b      | 5.3 ± 1.4b     | 5.6 ± 1.0b      |
|  | Hydroxycinnamic Acids                         |                 |                 |                |                 |
|  | <i>cis</i> -Caftaric acid (µg/g)              | 66 ± 7          | 67 ± 8          | 65 ± 1         | 73 ± 5          |
|  | <i>trans</i> -Caftaric acid (µg/g)            | 51 ± 5          | 55 ± 11         | 44 ± 5         | 46 ± 7          |
|  | <i>p</i> -Coumaric acid                       | 0.42 ± 0.05     | 0.55 ± 0.51     | 0.85 ± 0.11    | 0.47 ± 0.13     |
|  | <i>Z</i> - and <i>E</i> -Coutaric acid (µg/g) | 201 ± 19        | 323 ± 43        | 232 ± 6        | 239 ± 15        |
|  | <i>Z</i> -Fertaric acid (µg/g)                | 40 ± 0.0b       | 97 ± 9c         | 22 ± 0.3a      | 23 ± 0.6a       |
|  | <i>E</i> -Fertaric acid (µg/g)                | 7.7 ± 0.1a      | 10 ± 2ab        | 14 ± 1b        | 18 ± 1c         |
|  | Syringic acid (µg/g)                          | 0.13 ± 0.01     | 0.15 ± 0.01     | 0.20 ± 0.03    | 0.21 ± 0.03     |
|  | Aldehydes                                     |                 |                 |                |                 |
|  | Hexanal (ug/g)                                | 33 ± 3ab        | 26 ± 5a         | 38 ± 1b        | 31 ± 2ab        |
|  | <i>E</i> -2-Hexenal (ug/g)                    | 9.8 ± 0.8a      | 9.7 ± 1.8a      | 14 ± 0.4b      | 14 ± 1.9b       |
|  | 1-Heptanal                                    | 22 ± 0.7b       | 18 ± 1a         | 25 ± 0.6b      | 22 ± 2b         |
|  | <i>E</i> -2-Octenal                           | 9.1 ± 0.1b      | 5.7 ± 0.6a      | 9.6 ± 0.1b     | 9.5 ± 0.7b      |
|  | Nonanal                                       | 25 ± 3c         | 14 ± 1a         | 29 ± 0.7d      | 18 ± 0.4b       |
|  | <i>E</i> -2-Nonenal                           | 19 ± 0.1c       | 15 ± 0.5a       | 18 ± 0.1c      | 17 ± 1b         |
|  | Benzaldehyde                                  | 2.9 ± 0.1ab     | 2.4 ± 0.3a      | 3.2 ± 0.4ab    | 3.5 ± 0.4b      |
|  | Furfural                                      | 0.33 ± 0.06b    | 0.31 ± 0.06b    | 0.07 ± 0.00a   | 0.10 ± 0.00a    |
|  | Isoprenoids                                   |                 |                 |                |                 |
|  | 1,4-Cineole                                   | 0.054 ± 0.004a  | 0.054 ± 0.002a  | 0.049 ± 0.005a | 0.085 ± 0.005b  |
|  | α-Terpinene                                   | 0.28 ± 0.03b    | 0.15 ± 0.00a    | 0.15 ± 0.06a   | 0.09 ± 0.01a    |
|  | γ-Terpinene                                   | 0.033 ± 0.004ab | 0.038 ± 0.004b  | 0.024 ± 0.004a | 0.025 ± 0.003a  |
|  | Terpinen-4-ol                                 | 0.29 ± 0.00b    | 0.073 ± 0.011a  | 0.065 ± 0.01a  | 0.091 ± 0.017a  |
|  | α-Terpineol                                   | 7.9 ± 0.02b     | 1.0 ± 0.2a      | 1.0 ± 0.3a     | 1.6 ± 0.5a      |
|  | β-Citronellol                                 | 0.052 ± 0.006c  | 0.041 ± 0.004bc | 0.024 ± 0.002a | 0.024 ± 0.004ab |
|  | Linalool                                      | 7.3 ± 0.1c      | 7.1 ± 0.2c      | 5.9 ± 0.1a     | 6.4 ± 0.0b      |
|  | Nerol                                         | 0.096 ± 0.005bc | 0.11 ± 0.01c    | 0.070 ± 0.001a | 0.083 ± 0.008ab |
|  | Geraniol                                      | 1.3 ± 0.1c      | 1.0 ± 0.13b     | 0.055 ± 0.06a  | 0.61 ± 0.11a    |
|  | C <sub>13</sub> -apocarotenoids               |                 |                 |                |                 |
|  | β-Damascenone                                 | 0.024 ± 0.000c  | 0.023 ± 0.004bc | 0.014 ± 0.000a | 0.018 ± 0.000ab |
|  | α-Ionone                                      | 0.016 ± 0.007   | 0.020 ± 0.010   | 0.010 ± 0.000  | 0.019 ± 0.007   |
|  | β-Ionone                                      | 0.44 ± 0.02c    | 0.32 ± 0.02b    | 0.26 ± 0.01a   | 0.25 ± 0.03a    |
|  | Alcohols                                      |                 |                 |                |                 |
|  | 1-Pentanol                                    | 51 ± 4ab        | 56 ± 0.5b       | 43 ± 6a        | 52 ± 4ab        |
|  | 1-Hexanol                                     | 185 ± 16a       | 241 ± 36b       | 297 ± 3.4c     | 219 ± 11ab      |
|  | <i>E</i> -2-Hexenol                           | 194 ± 2a        | 298 ± 28b       | 279 ± 6b       | 190 ± 23a       |
|  | <i>Z</i> -2-Hexenol                           | 0.44 ± 0.00a    | 1.6 ± 0.1b      | 2.4 ± 0.2c     | 3.0 ± 0.3d      |
|  | <i>E</i> -3-Hexenol                           | 2.1 ± 0.1a      | 4.1 ± 0.5b      | 11 ± 0.4d      | 6.7 ± 0.08c     |
|  | <i>Z</i> -3-Hexenol                           | 21 ± 0.2a       | 44 ± 4b         | 48 ± 2b        | 45 ± 0.6b       |
|  | 2-Ethyl-1-hexanol                             | 8.5 ± 0.5       | 9.0 ± 0.6       | 8.4 ± 0.5      | 8.7 ± 0.0       |



|                     |               |               |              |              |
|---------------------|---------------|---------------|--------------|--------------|
| 1-Heptanol          | 0.40 ± 0.04ab | 0.37 ± 0.08ab | 0.28 ± 0.02a | 0.42 ± 0.06b |
| 1-Octanol           | 4.6 ± 1.3bc   | 6.4 ± 0.02c   | 2.7 ± 0.0a   | 3.7 ± 0.6ab  |
| Benzyl alcohol      | 3.1 ± 0.1b    | 2.4 ± 0.5ab   | 1.7 ± 0.2a   | 3.4 ± 0.7b   |
| 2-Phenylethanol     | 7.5 ± 0.1a    | 7.5 ± 1.0a    | 5.6 ± 0.5a   | 11 ± 2b      |
| Acetates            |               |               |              |              |
| Hexyl acetate       | 0.71 ± 0.05a  | 1.2 ± 0.2b    | 1.6 ± 0.2bc  | 1.7 ± 0.05c  |
| Z-3-Hexenyl acetate | 1.0. ± 0.0a   | 3.3 ± 0.0c    | 1.8 ± 0.1b   | 2.0 ± 0.2b   |
| Others              |               |               |              |              |
| Hexanoic acid       | 133 ± 34      | 123 ± 10      | 129 ± 23     | 142 ± 51     |

<sup>1</sup>Different letters indicate significantly different groups according to Tukey's HSD comparison of means,  $p=0.05$ . <sup>2</sup>All compounds in ng/g unless indicated. Flavonoid-3-O-glc, Flavonoid-3-O-glucoside; Flavonoid-3-O-gal, Flavonoid-3-O-galactoside; Flavonoid-3-O-gln, Flavonoid-3-O-gluconoride.

**Table S5.** Data Blocks, ASCA Variable indices and K-means clustering

| Variable Name               | Data Block | ASCA Variable Index | K-Means cluster |
|-----------------------------|------------|---------------------|-----------------|
| Neoxanthin                  | CAR        | 1                   | 2               |
| Violaxanthin                | CAR        | 2                   | 1               |
| Zeaxanthin                  | CAR        | 3                   | 1               |
| Lutein                      | CAR        | 4                   | 2               |
| $\beta$ -Carotene           | CAR        | 5                   | 3               |
| Chlorophyll <i>a</i>        | CAR        | 6                   | 2               |
| Chlorophyll <i>b</i>        | CAR        | 7                   | 2               |
| Pheophytin                  | CAR        | 8                   | 2               |
| Hexanal                     | FV         | 9                   | 3               |
| <i>E</i> -2-Hexenal         | FV         | 10                  | 3               |
| 1-Heptanal                  | FV         | 11                  | 3               |
| <i>E</i> -2-Octenal         | FV         | 12                  | 3               |
| Nonanal                     | FV         | 13                  | 3               |
| <i>E</i> -2-Nonenal         | FV         | 14                  | 3               |
| Benzaldehyde                | FV         | 15                  | 3               |
| Furfural                    | FV         | 16                  | 4               |
| 1,4-Cineole                 | FV         | 17                  | 3               |
| $\alpha$ -Terpinene         | FV         | 18                  | 4               |
| $\gamma$ -Terpinene         | FV         | 19                  | 4               |
| Terpinen-4-ol               | FV         | 20                  | 4               |
| $\alpha$ -Terpineol         | FV         | 21                  | 2               |
| $\beta$ -Citronellol        | FV         | 22                  | 4               |
| Linalool                    | FV         | 23                  | 4               |
| Nerol                       | FV         | 24                  | 4               |
| Geraniol                    | FV         | 25                  | 4               |
| $\beta$ -Damascenone        | FV         | 26                  | 4               |
| $\alpha$ -Ionone            | FV         | 27                  | -               |
| $\beta$ -Ionone             | FV         | 28                  | 4               |
| 1-Pentanol                  | FV         | 29                  | 4               |
| 1-Hexanol                   | FV         | 30                  | 3               |
| <i>E</i> -2-Hexenol         | FV         | 31                  | 4               |
| <i>Z</i> -2-Hexenol         | FV         | 32                  | 1               |
| <i>E</i> -3-Hexenol         | FV         | 33                  | 1               |
| <i>Z</i> -3-Hexenol         | FV         | 34                  | 1               |
| 2-Ethyl-1-hexanol           | FV         | 35                  | -               |
| 1-Heptanol                  | FV         | 36                  | 4               |
| 1-Octanol                   | FV         | 37                  | 4               |
| Benzyl alcohol              | FV         | 38                  | 4               |
| 2-Phenylethanol             | FV         | 39                  | 3               |
| Hexyl acetate               | FV         | 40                  | 5               |
| <i>Z</i> -3-Hexenyl acetate | FV         | 41                  | 4               |
| Hexanoic acid               | FV         | 42                  | -               |

|                         |    |    |   |
|-------------------------|----|----|---|
| Quercetin 3-O-glc       | PP | 43 | 1 |
| Quercetin 3-O-gal       | PP | 44 | 1 |
| Quercetin 3-O-gln       | PP | 45 | 1 |
| Laricitrin 3-O-glc      | PP | 46 | 4 |
| Myricetin 3-O-glc       | PP | 47 | 1 |
| Myricetin 3-O-gal       | PP | 48 | 4 |
| Myricetin 3-O-gln       | PP | 49 | 5 |
| Isorhamnetin 3-O-glc    | PP | 50 | 1 |
| Isorhamnetin 3-O-gln    | PP | 51 | 1 |
| Kaempferol 3-O-glc      | PP | 52 | 1 |
| Kaempferol 3-O-gal      | PP | 53 | 1 |
| Kaempferol 3-O-gln      | PP | 54 | 1 |
| Z-Resveratrol           | PP | 55 | 5 |
| E-Resveratrol           | PP | 56 | 4 |
| Trimer                  | PP | 57 | 4 |
| Dihydroquercetin        | PP | 58 | 4 |
| Astilbin                | PP | 59 | 1 |
| Rutin                   | PP | 60 | 1 |
| Z-Piceid                | PP | 61 | 5 |
| Naringenin chalcone     | PP | 62 | 5 |
| (+)-Gallocatechin       | PP | 63 | 4 |
| Procyanidin Dimer B1    | PP | 64 | 4 |
| (-)-Epigallocatechin    | PP | 65 | 4 |
| (+)-Catechin            | PP | 66 | 4 |
| (-)-Epicatechin         | PP | 67 | 4 |
| (-)-Epicatechin gallate | PP | 68 | 1 |
| Tyrosine                | PP | 69 | - |
| Tryptophan              | PP | 70 | - |
| Phenylalanine           | PP | 71 | 4 |
| Glutathione reduced     | PP | 72 | 4 |
| Glutathione oxidised    | PP | 73 | 1 |
| Z-Caftaric acid         | PP | 74 | 4 |
| E-Caftaric acid         | PP | 75 | 4 |
| Z- and E-Coutaric acid  | PP | 76 | 4 |
| p-Coumaric acid         | PP | 77 | - |
| Z-Fertaric acid         | PP | 78 | 4 |
| E-Fertaric acid         | PP | 79 | 5 |
| Syringic acid           | PP | 80 | - |
